# Supplementary material
Source: Research Square preprint supplement (doi:10.21203/rs.3.rs-9024481/v1)
Supplement: Supplementary file 2 [file 415ff93b901125b4b19e93b8.docx]

Sensitivity Analysis


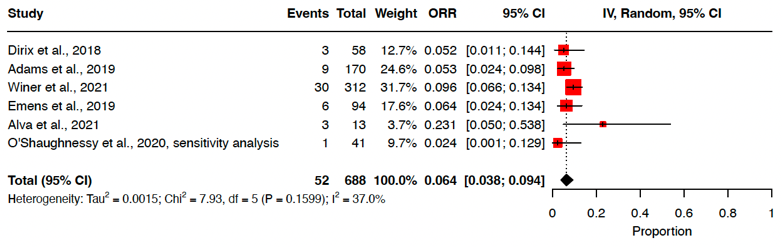

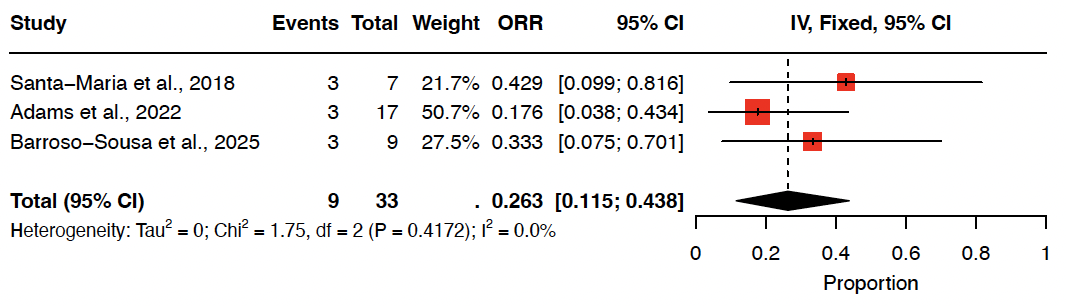


**A**

**B**

ORR, Single ICI

ORR, Dual ICI

**Figure S1. Forest plots of ORR of (A) single and (B) dual ICI studies, sensitivity analysis.** Among single ICI studies, ORR was 6.4%, whereas ORR among dual ICI studies was 26.3%. The sensitivity analysis excluded single-agent or dual ICI studies that used HDAC inhibitors.

6-month PFS, Dual ICI

6-month PFS, Single ICI


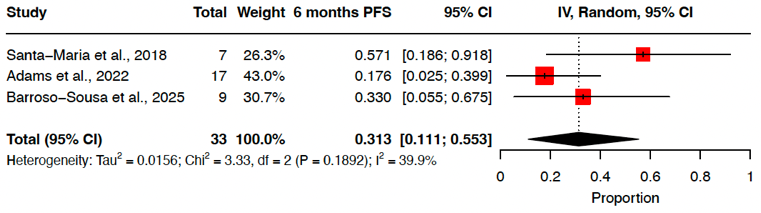


**B**


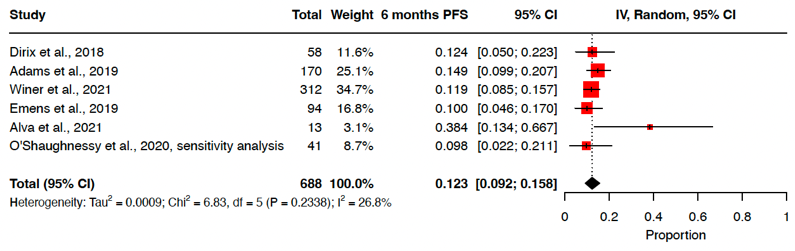


**A**

12-month PFS, Dual ICI

12-month PFS, Single ICI


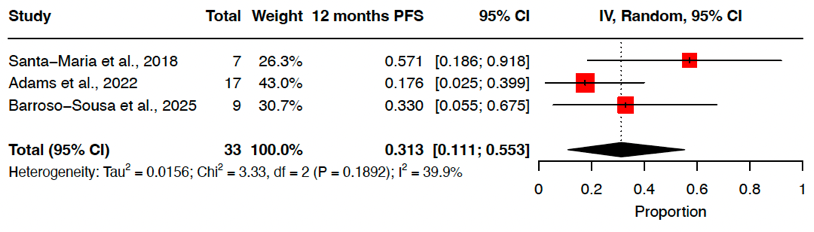


**D**


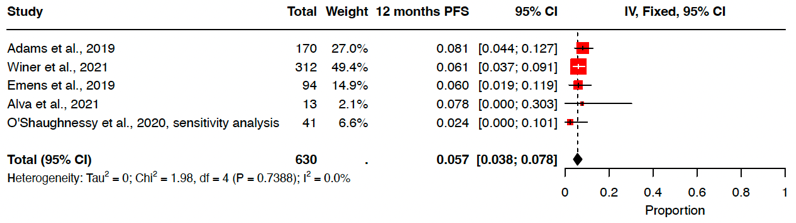


**C**

**Figure S2. Forest plot of 6-month PFS of (A) single and (B) combination ICI studies and 12-month PFS of (C) single and (D) dual ICI studies, sensitivity analysis.** Estimated PFS rate at 6 months was 12.3% and 31.3% for single and dual ICI studies, respectively. Estimated PFS rate at 12 months was 5.7% and 31.3%, for single and dual ICI studies, respectively. The sensitivity analysis excluded single-agent or dual ICI studies that used HDAC inhibitors.
