# Supplementary material
Source: Research Square preprint supplement (doi:10.21203/rs.3.rs-9024481/v1)
Supplement: Supplementary file 3 [file 45d7c0b611399117865622f1.docx]

Search Strategy

#1: “breast cancer”

AND

#2: Immunotherapy "Nivolumab" OR "Pembrolizumab" OR “Cemiplimab” OR “Dostarlimab” OR “Retifanlimab” OR “Toripalimab” OR “Tislelizumab” OR “Spartalizumab” OR “Atezolizumab” OR “Avelumab” OR “Durvalumab” OR “Ipilimumab” OR “Tremelimumab”

AND

#3:

1. PD-1/PD-L1 AND HDAC
2. PD1/PDL1
3. PD-1/PD-L1 AND CTLA 4 AND HDAC
4. PD1/PDL1 AND CTLA4

AND

#4: clinical trial OR controlled trial OR randomized controlled trial OR comparative study OR pilot study OR clinical study OR phase i OR phase ii OR phase iii

#1 AND #2 AND #3 AND #4

Search Date

August 15, 2024

Search Results

- 1. PubMed: 143 articles
  2. Embase: 313 articles
  3. Cochrane library: 496 clinical trials
