# Supplementary material
Source: Research Square preprint supplement (doi:10.21203/rs.3.rs-9024481/v1)
Supplement: Supplementary file 4 [file 4624be9924e9e150a5b6d7bc.docx]

Quality of study assessment tool

1. For Randomized Controlled Trials, the Cochrane Risk of Bias Tool was used (<https://training.cochrane.org/handbook/current/chapter-08>). The tool includes 5 domains of assessment:
2. Bias arising from the randomization process
3. Bias due to deviations from intended interventions
4. Bias due to missing outcome data
5. Bias in measurement of the outcome
6. Bias in the selection of the reported result

For each domain, the risk of bias is assessed as follows:

- Low
- Some concerns
- High

Overall risk of bias:

- Low Risk of Bias: Low risk in all domains.
- Some Concerns: Some concerns in at least one domain but no high risk of bias.
- High Risk of Bias: High risk in at least one domain or some concerns in multiple domains.

Note: Studies at high risk of bias might be excluded from certain analyses or subjected to sensitivity analyses to check how they influence the overall results.

1. For non-randomized studies, Cochrane Risk of Bias In Non-randomized Studies of Interventions (ROBINS-I) Tool was used (<https://www.riskofbias.info/welcome/rob-2-0-tool/current-version-of-rob-2>). There are 7 domains:
2. Bias due to confounding (confounder factors like age, gender, socioeconomic status, health status,)
3. Bias in selection of participants into the study
4. Bias in classification of interventions
5. Bias due to deviations from intended interventions
6. Bias due to missing data
7. Bias in measurement of outcomes
8. Bias in selection of the reported result

The overall risk of bias will be assessed as either low, some concerns or high based on the assessment of the 7 domains.

Quality assessment of included studies

Table A1. Randomized studies: risk of bias assessment

|  | Studies | Randomization process | Deviations from intended interventions | Missing outcome data | Measurement of the outcome | Selection of the reported result | **Overall bias** |
| --- | --- | --- | --- | --- | --- | --- | --- |
| Single IO | Winer et al, 2021 | Low | Low | Low | Low | Low | **Low** |
| O'Shaughnessy et al, 2020 | Some concerns | Some concerns | Low | Low | Low | **Some concerns** |

Table A2. Single arm study: risk of bias assessment

|  | Studies | Pre-intervention | | At intervention | Post-intervention | | | |
| --- | --- | --- | --- | --- | --- | --- | --- | --- |
| Confounding (confounder factors like age, gender, health status) | Selection of participants into study | Classification of interventions | Deviations from intended interventions | Missing data | Measurement of outcomes | Selection of the reporter result |
| Single IO | Adams et al, 2019 | Low | Low | Low | Low | Low | Low | Low |
| Alva et al, 2021 | Low | Low | Low | Low | Low | Low | Low |
| Dirix et al, 2018 | Low | Low | Low | Low | Low | Low | Low |
| Emens et al, 2019 | Low | Low | Low | Low | Low | Low | Low |
| Dual IO | Santa-Maria et al, 2018 | Low | Low | Low | Low | Low | Low | Low |
| Roussos Torres et al, 2024 | Low | Low | Low | Low | Low | Low | Low |
| Adams et al, 2022 | Low | Low | Low | Low | Low | Low | Low |
| Barroso-Sousa et al, 2025 | Low | Low | Low | Low | Low | Low | Low |
